# Supplementary material for: Tropomyosin isoforms differentially affect muscle contractility in the head and body regions of the nematode Caenorhabditis elegans
Source: PubMed Central journal article supplement — Mol Biol Cell. 2018 May 1;29(9):1075–88. doi: 10.1091/mbc.E17-03-0152 (PMC5921574; doi:10.1091/mbc.e17-03-0152), 2018-05-01
Supplement: mbc-29-1075-s001.pdf [file mbc-29-1075-s001.pdf]

# Supplemental Materials

*Molecular Biology of the Cell*

Barnes et al.

Supplemental materials

## Tropomyosin isoforms differentially affect muscle contractility in the head and body regions in the nematode *Caenorhabditis elegans*

Dawn E. Barnes<sup>1</sup>, Eichi Watabe<sup>2</sup>, Kanako Ono<sup>1</sup>, Euiyoung Kwak<sup>1</sup>, Hidehito Kuroyanagi<sup>2</sup>, Shoichiro Ono<sup>1</sup>

<sup>1</sup>Department of Pathology, Department of Cell Biology, and Winship Cancer Institute, Emory University, Atlanta, Georgia 30322, USA

<sup>2</sup>Laboratory of Gene Expression, Medical Research Institute, Tokyo Medical and Dental University, Tokyo 113-8510, Japan

Supplemental Figure S1

Supplemental Tables S1-S3

|           |           |            |           |        |          |          |        |           |                           |                          |
|-----------|-----------|------------|-----------|--------|----------|----------|--------|-----------|---------------------------|--------------------------|
| CAAGATCGT | CGAGCTTGA | AGAGGAGIT  | CCGCGTCGT | GGTAA  | AACTTGA  | AATCCCT  | TGAAC  | TTCCGAG   | <i>C.elegans</i> exon 7a  |                          |
| CAAATCGT  | CGAGCTTGA | AGAGGAGIT  | CCGCGTCGT | GGTAA  | AACTTGA  | AATCTCT  | TGAAC  | TTCCGAG   | <i>C.briggsae</i> exon 7a |                          |
| CAAATCGT  | CGAGCTTGA | AGAGGAGIT  | CCGCGTCGT | CGAAA  | AACTTGA  | AATCTCT  | TGAAC  | TTCCGAG   | <i>C.remanei</i> exon 7a  |                          |
| CAAGATCGT | CGAACT    | TGAGGAGGAG | CTCCG     | TGTCGT | CGAAA    | CAACTTGA | AATC   | ACTTGAGGT | TTCCGAG                   | <i>C.elegans</i> exon 7b |
| CAAGATCGT | CGAGCTTGA | AGAGGAGIT  | CCGCGTCGT | CGAAA  | CAACTTGA | AATCCCT  | TGAGGT | TTCCGAG   | <i>C.briggsae</i> exon 7b |                          |
| CAAGATCGT | CGAGCTTGA | AGAGGAGIT  | CCGCGTCGT | CGAAA  | CAACTTGA | AATCTCT  | TGAAG  | TTCCGAG   | <i>C.remanei</i> exon 7b  |                          |

|      |           |     |            |       |       |          |      |     |    |      |   |        |         |                           |
|------|-----------|-----|------------|-------|-------|----------|------|-----|----|------|---|--------|---------|---------------------------|
| GA   | AAAGGCACT | TGA | BAAGGAGGAC | ATCT  | TTGCC | GAGCAGAT | TCGT | CAG | TC | GATT | T | CAGACT | GAAGGAG | <i>C.elegans</i> exon 7a  |
| GAGA | AAAGGCACT | TGA | BAAGGAGGAC | ATCT  | TCGCT | GAGCAGAT | CCGT | CAG | TC | GATT | T | CAGACT | GAAGGAG | <i>C.briggsae</i> exon 7a |
| GA   | AAAGGCACT | TGA | BAAGGAGGAT | TATCT | TTGCT | GAGCAGAT | TCGT | CAG | TC | GATT | T | CAGACT | GAAGGAG | <i>C.remanei</i> exon 7a  |
| GAGA | AAAGGCACT | TGA | BAAGGAGGAC | ATCT  | TCGCT | GAGCAGAT | CCGT | CAG | TC | GATT | T | CAGACT | GAAGGAG | <i>C.elegans</i> exon 7b  |
| GAGA | AAAGGCACT | TGA | BAAGGAGGAC | ATCT  | TCGCT | GAGCAGAT | CCGT | CAG | TC | GATT | T | CAGACT | GAAGGAG | <i>C.briggsae</i> exon 7b |
| GAGA | AAAGGCACT | TGA | BAAGGAGGAC | ATCT  | TCGCT | GAGCAGAT | CCGT | CAG | TC | GATT | T | CAGACT | GAAGGAG | <i>C.remanei</i> exon 7b  |

**Supplemental Fig. S1.** Nucleotide sequence alignment of *lev-11* exon 7s (E7a and E7b) from *C. elegans*, *C. briggsae*, and *C. remanei*. Conserved residues in more than half of examined sequences are shaded in black.

---

**Supplemental Table S1. Worm strains**

---

| Strain  | Transgene               | Genotype                                                                                               |
|---------|-------------------------|--------------------------------------------------------------------------------------------------------|
| KH2372  | E7a-mCherry<br>E7b-EGFP | <i>ybEx2372 [eef-1A.1::LEV-11E6E7aE8-GGS6-mCherry eef-1A.1::LEV-11E6E7bE8-GGS6-EGFP]</i>               |
| KH2386  | E7a-mCherry<br>E7b-EGFP | <i>ybIs2381 [myo-3::LEV-11E6E7aE8-GGS6-mCherry myo-3::LEV-11E6E7bE8-GGS6-EGFP pBSKII(-)] X</i>         |
| ON269   | GFP-LEV-11A             | <i>ktEx187 [myo-3::GFP::LEV-11A cDNA]</i>                                                              |
| ON335   | GFP-LEV-11O             | <i>ktEx238 [myo-3::GFP::LEV-11O cDNA]</i>                                                              |
| ZZ12    | -                       | <i>lev-11(x12) I</i>                                                                                   |
| VC20516 | -                       | A whole genome-sequenced strain containing <i>lev-11(gk334531) I</i> from the Million Mutation Project |
| ON315   | -                       | <i>lev-11(gk334531) I</i> (outcrossed 6 times)                                                         |

---

**Supplemental Table S2. Sequences of the primers used to detect endogenous LEV-11 mRNAs in the RT-PCR assays and molecular cloning.**

| Position             | Direction | Sequence                                                                                    |
|----------------------|-----------|---------------------------------------------------------------------------------------------|
| Exon 1 <sup>1</sup>  | Forward   | 5'- <u>CACCATGGACGCCATTAAGAAGAAGATG</u> -3'                                                 |
| Exon 1 <sup>2</sup>  | Forward   | 5'-<br><u>AGGAGATATA</u> <u>CCATGG</u> <b>CTAG</b> <u>CATGGACGCCATTAAGAAGAAGATG</u> -<br>3' |
| Exon 3b <sup>1</sup> | Forward   | 5'- <u>CACCATGT</u> CGAAGGTAAACAAGGAGG-3'                                                   |
| Exon 7a              | Forward   | 5'-CAGATTCGTCAGCTCGATTTC-3'                                                                 |
| Exon 7a              | Reverse   | 5'-GCAAAGATGTCCTCCTTCTCA-3'                                                                 |
| Exon 7b              | Forward   | 5'-CAACGTGAGGACTCGTACGAG-3'                                                                 |
| Exon 7b              | Reverse   | 5'-CAGTCTGGATGAGACGGTG-3'                                                                   |
| Exon 9c              | Reverse   | 5'-TTAATATCCGGAGAGCTCTTGGAAG-3'                                                             |
| Exon 9c <sup>2</sup> | Reverse   | 5'- <u>GTTAGCAGCCGGATCT</u> TAATATCCGGAGAGCTCTTGGAAG-3'                                     |

<sup>1</sup>Underlines indicate CACC sequences for directional TOPO cloning.

<sup>2</sup>Dashed underlines indicate overlapping sequences with pET-3d for In-fusion cloning. Bold characters indicate extra codons for N-terminal Ala-Ser extension.

---

**Supplemental Table S3. Sequences of primers used in plasmid construction.**

---

Primers used to amplify genomic fragments.

---

| Amplified fragments           | Sequence                                                                                               |
|-------------------------------|--------------------------------------------------------------------------------------------------------|
| <i>lev-11</i> exon 6 – exon 8 | 5' - <u>AAAAAGCAGGCT</u> <u>cca</u> CCATGGTTGAAGCTGATCT-3'<br>5' -TATACAAAGTTGCTTCGAGTCTGTCGACCTCCT-3' |

---

Underlines indicate parts of *attB* sequences for BP cloning or *Xba* I recognition site (exon 6 Reverse). Lower case indicates nucleotides for introducing Kozak's consensus.

---

Primers used to construct GFP-LEV-11 expression vectors.

---

|                         |                                                                                                    |
|-------------------------|----------------------------------------------------------------------------------------------------|
| LEV-11A or LEV-11O cDNA | 5' -ACAAGCTTTGGAATTCATGGACGCCATTAAGAAGAAGATG-3'<br>5' -TGTATGGCCGGCTAGCGGATGTTTAATATCCGGAGAGCTC-3' |
|-------------------------|----------------------------------------------------------------------------------------------------|

---

Underlines indicate overlapping sequences with pPD118.20 for In-fusion cloning.

---

Primers used for mutagenesis.

---

| Mutation                                  | Sequence                                                                                                                                            |
|-------------------------------------------|-----------------------------------------------------------------------------------------------------------------------------------------------------|
| <i>lev-11</i> exon 7a – termination codon | 5' -GATTCGTCAGCTCtAaTTCAGACT-3'<br>5' -AGTCTGAAtTaGAGCTGACGAATC-3'                                                                                  |
| <i>lev-11</i> exon 7b – termination codon | 5' -CGCACCGTCTaATCCAGAC-3'<br>5' -GTCTGGATtAGACGGTGCG-3'                                                                                            |
| LEV-11A(E234K) protein                    | 5' -<br>CGTCTCATCCAGACTGAAGaAGGCTGAGACCCGTGCCGAATTCG-3'<br>5' -                                                                                     |
| LEV-11O(E196K) protein                    | CGAATTCGGCACGGGTCTCAGCCTtCTTCAGTCTGGATGAGACG-3'<br>5' -CAAGATCGTGGAGCTTGAAGAGaAGTTGCGCGTCGTTGG-3'<br>5' -CCAACGACGCGCAACTtCTCTTCAAGCTCCACGATCTTG-3' |

---

Lower case indicates nucleotides for disrupting potential splice sites (exon 4b), introducing termination codons (exons 5 and 7), disrupting a termination codon (exon 9b), introducing missense mutations in LEV-11A(E234K) and LEV-11O(E196K).

---
